# Supplementary material for: Association between minimal decrease in platelet counts and outcomes in septic patients: a retrospective observational study
Source: HighWire-hosted journal article supplement (doi:10.1136/bmjopen-2022-069027), 2023-04-01
Supplement: bmjopen-2022-069027supp001_data_supplement.pdf [file bmjopen-2022-069027supp001_data_supplement.pdf]

Table S1. All Missing values of data from MIMIC-IV

| variables                         | Missing number n (%) |
|-----------------------------------|----------------------|
| age                               |                      |
| gender                            |                      |
| weight                            | 38 (0.47)            |
| ethnicity                         |                      |
| myocardial_infarct                |                      |
| congestive_heart_failure          |                      |
| peripheral_vascular_disease       |                      |
| cerebrovascular_disease           |                      |
| dementia                          |                      |
| chronic_pulmonary_disease         |                      |
| rheumatic_disease                 |                      |
| peptic_ulcer_disease              |                      |
| mild_liver_disease                |                      |
| diabetes_without_cc               |                      |
| diabetes_with_cc                  |                      |
| paraplegia                        |                      |
| renal_disease                     |                      |
| malignant_cancer                  |                      |
| severe_liver_disease              |                      |
| metastatic_solid_tumor            |                      |
| aids                              |                      |
| sofa_score                        |                      |
| apsiii                            |                      |
| sapsii                            |                      |
| pt                                | 760 (9.52)           |
| aptt                              | 805 (10.08)          |
| white_blood_cell_counts           | 3 (0.03)             |
| platelet_counts0 <sup>a</sup>     |                      |
| platelet_counts3 <sup>b</sup>     |                      |
| LOS_hospital                      |                      |
| hospital_expire_flag <sup>c</sup> |                      |
| LOS_ICU                           |                      |

LOS=length of stay

<sup>a</sup>platelete\_counts0 are regarded as platelet counts on day 1 of ICU admission

<sup>b</sup>platelete\_counts3 are regarded as platelet counts on day 4 of ICU admission

<sup>c</sup>hospital\_expire\_flag is regarded as in-hospital death

Table S2: Baseline of patient characteristics stratified by proportion of platelet counts on day four of ICU admission

| Characteristic                            | Overall          | declining proportion of platelet counts |                  | p value |
|-------------------------------------------|------------------|-----------------------------------------|------------------|---------|
|                                           |                  | platelet>10%                            | platelet≤10%     |         |
| Number                                    | 7981             | 3802                                    | 4179             |         |
| Gender, M (%)                             | 4594 (57.6)      | 2180 (57.3)                             | 2414 (57.8)      | 0.717   |
| Median age (IQR), yr                      | 65.8 [53.6 77.3] | 66.2 [54.6 77.4]                        | 65.3 [52.6 77.3] | 0.012   |
| Median weight (IQR), kg                   | 80.0 [67.0 96.5] | 79.8 [66.8 96.5]                        | 80.0 [67.0 96.4] | 0.586   |
| Ethnicity, n (%)                          |                  |                                         |                  | 0.671   |
| American Indian                           | 20 (0.3)         | 8 (0.2)                                 | 12 (0.3)         |         |
| Asian                                     | 205 (2.6)        | 100 (2.6)                               | 105 (2.5)        |         |
| Black                                     | 707 (8.9)        | 325 (8.5)                               | 382 (9.1)        |         |
| White                                     | 5025 (63.0)      | 2382 (62.7)                             | 2643 (63.2)      |         |
| Hispanic                                  | 258 (3.2)        | 132 (3.5)                               | 126 (3.0)        |         |
| Others                                    | 1766 (22.1)      | 855 (22.5)                              | 911 (21.8)       |         |
| Select comorbidities <sup>a</sup> , n (%) |                  |                                         |                  |         |
| Cardiovascular disease                    | 2826 (35.4)      | 1473 (38.7)                             | 1353 (32.4)      | <0.001  |
| Chronic pulmonary disease                 | 1945 (24.4)      | 941 (24.8)                              | 1004 (24.0)      | 0.467   |
| Liver disease                             | 1466 (18.4)      | 816 (21.5)                              | 650 (15.6)       | <0.001  |
| Renal disease                             | 1582 (19.8)      | 796 (20.9)                              | 786 (18.8)       | 0.019   |
| diabetes                                  | 2256 (28.3)      | 1109 (29.2)                             | 1147 (27.4)      | 0.093   |
| Vascular disease                          | 2359 (29.6)      | 1082 (28.5)                             | 1277 (30.6)      | 0.043   |
| Cancer <sup>b</sup>                       | 1189 (14.9)      | 620 (16.3)                              | 569 (13.6)       | 0.001   |
| Aids                                      | 56 (0.7)         | 19 (0.5)                                | 37 (0.9)         | 0.054   |
| Others <sup>c</sup>                       | 1507 (18.9)      | 705 (18.5)                              | 802 (19.2)       | 0.477   |
| Status at admission (median [IQR])        |                  |                                         |                  |         |
| Sofa score                                | 7.0 [5.0 11.0]   | 8.0 [5.0 12.0]                          | 6.0 [4.0 9.0]    | <0.001  |
| Apsiii                                    | 61.0 [44.0 81.0] | 66.0 [49.0 88.8]                        | 56.0 [42.0 74.0] | <0.001  |
| Sapsii                                    | 40.0 [32.0 51.0] | 44.0 [35.0 54.0]                        | 38.0 [30.0 47.0] | <0.001  |
| Laboratory test (median [IQR])            |                  |                                         |                  |         |
| White blood cell counts, k/ul             | 12.0 [8.6 16.3]  | 13.0 [9.3 17.8]                         | 11.3 [8.3 15.1]  | <0.001  |
| Pt (s)                                    | 14.3 [12.7 17.3] | 14.6 [12.8 18.2]                        | 14.1 [12.6 16.5] | <0.001  |
| Aptt (s)                                  | 31.7 [27.5 40.7] | 33.0 [28.1 44.6]                        | 30.8 [27.2 37.7] | <0.001  |
| ICU outcome                               |                  |                                         |                  |         |
| 30-day mortality, n (%)                   | 1483 (18.6)      | 892 (23.5)                              | 591 (14.1)       | <0.001  |
| Median hospital LOS (IQR), d              | 13.9 [9.0 22.0]  | 14.1 [9.0 22.3]                         | 13.7 [9.0 21.8]  | 0.122   |
| Median ICU LOS (IQR), d                   | 7.1 [4.8 12.1]   | 7.5 [4.9 12.9]                          | 6.8 [4.7 11.3]   | <0.001  |

IQR, interquartile range; Sofa, sequential organ failure assessment; Apsiii, acute physiology score; Sapsii, simplified acute physiology score; Pt, prothrombin time; Aptt, activated partial thromboplastin time; LOS, length of stay.

<sup>a</sup>Comorbidities are defined by the Charlson comorbidity index.

<sup>b</sup>Cancer includes malignant cancer and metastatic solid tumor.

<sup>c</sup>Others includes dementia, rheumatic disease, peptic ulcer disease and paraplegia.

Table S3: Univariate and multivariate analysis for assessing the mortality within 30 days

| Variables              | Univariate analysis |           |          | Multivariate analysis |           |          |
|------------------------|---------------------|-----------|----------|-----------------------|-----------|----------|
|                        | OR                  | CI 95%    | <i>p</i> | OR                    | CI 95%    | <i>p</i> |
| Age                    | 1.02                | 1.02-1.03 | <0.001   | 1.03                  | 1.03-1.04 | <0.001   |
| Cardiovascular disease | 1.41                | 1.26-1.58 | <0.001   | 1.07                  | 0.94-1.23 | 0.307    |
| Liver disease          | 1.94                | 1.70-2.21 | <0.001   | 1.61                  | 1.37-1.89 | <0.001   |
| Renal disease          | 1.48                | 1.30-1.69 | <0.001   | 0.97                  | 0.83-1.12 | 0.646    |
| Vascular disease       | 1.31                | 1.16-1.48 | <0.001   | 1.56                  | 1.36-1.78 | <0.001   |
| Cancer                 | 1.75                | 1.52-2.02 | <0.001   | 1.91                  | 1.62-2.25 | <0.001   |
| Sapsii                 | 1.04                | 1.03-1.04 | <0.001   | 0.99                  | 0.98-0.99 | <0.001   |
| Sofa score             | 1.15                | 1.13-1.16 | <0.001   | 1.01                  | 0.99-1.03 | 0.469    |
| Apsiii                 | 1.03                | 1.03-1.03 | <0.001   | 1.03                  | 1.03-1.03 | <0.001   |
| WBC (k/ul)             | 1.01                | 1.01-1.02 | <0.001   | 1.01                  | 1.00-1.01 | 0.080    |
| Pt (s)                 | 1.03                | 1.02-1.04 | <0.001   | 1.01                  | 1.01-1.02 | <0.001   |
| Aptt (s)               | 1.01                | 1.01-1.01 | <0.001   | 1.00                  | 1.00-1.01 | 0.051    |
| "platelet≤10%          | 0.54                | 0.48-0.60 | <0.001   | 0.73                  | 0.64-0.82 | <0.001   |

CI, confidence interval; OR, odds ratio; Sapsii, simplified acute physiology score; Sofa, sequential organ failure assessment; Apsiii, acute physiology score; WBC, white blood cell counts; Pt, prothrombin time; Aptt, activated partial thromboplastin time.

"platelet≤10% is regarded as declining proportion of platelet counts on day 4 of ICU admission.

Table S4. Univariate and multivariate analyses were performed to assess mortality within 30 days, excluding patients who had no decline or even an increase in platelet counts on day four at the time of study inclusion

| Variables                 | Univariate analysis |           |          | Multivariate analysis |           |          |
|---------------------------|---------------------|-----------|----------|-----------------------|-----------|----------|
|                           | OR                  | CI 95%    | <i>p</i> | OR                    | CI 95%    | <i>p</i> |
| Age                       | 1.02                | 1.01-1.02 | <0.001   | 1.03                  | 1.02-1.03 | <0.001   |
| Cardiovascular disease    | 1.32                | 1.15-1.52 | <0.001   | 1.09                  | 0.93-1.28 | 0.294    |
| Liver disease             | 1.94                | 1.66-2.26 | <0.001   | 1.57                  | 1.30-1.89 | <0.001   |
| Renal disease             | 1.33                | 1.13-1.56 | 0.001    | 0.92                  | 0.76-1.10 | 0.347    |
| Vascular disease          | 1.22                | 1.06-1.41 | 0.007    | 1.56                  | 1.32-1.83 | <0.001   |
| Cancer                    | 1.69                | 1.42-2.00 | <0.001   | 1.83                  | 1.50-2.22 | <0.001   |
| Sapsii                    | 1.04                | 1.03-1.04 | <0.001   | 0.99                  | 0.98-1.00 | 0.003    |
| Sofa                      | 1.14                | 1.12-1.16 | <0.001   | 1.00                  | 0.97-1.03 | 0.885    |
| Apsiii                    | 1.03                | 1.02-1.03 | <0.001   | 1.03                  | 1.03-1.03 | <0.001   |
| WBC (k/ul)                | 1.01                | 1.01-1.02 | <0.001   | 1.01                  | 1.00-1.01 | 0.166    |
| Pt (s)                    | 1.03                | 1.03-1.04 | <0.001   | 1.02                  | 1.01-1.03 | <0.001   |
| Aptt (s)                  | 1.01                | 1.01-1.01 | <0.001   | 1.00                  | 1.00-1.01 | 0.139    |
| <sup>a</sup> platelet≤10% | 0.55                | 0.46-0.65 | <0.001   | 0.69                  | 0.57-0.84 | 0.001    |

CI, confidence interval; OR, odds ratio; Sapsii, simplified acute physiology score; Sofa, sequential organ failure assessment; Apsiii, acute physiology score; WBC, white blood cell counts; Pt, prothrombin time; Aptt, activated partial thromboplastin time.

<sup>a</sup>platelet≤10% is regarded as declining proportion of platelet counts on day 4 of ICU admission.

Figure S1. Kaplan-Meier survival curves

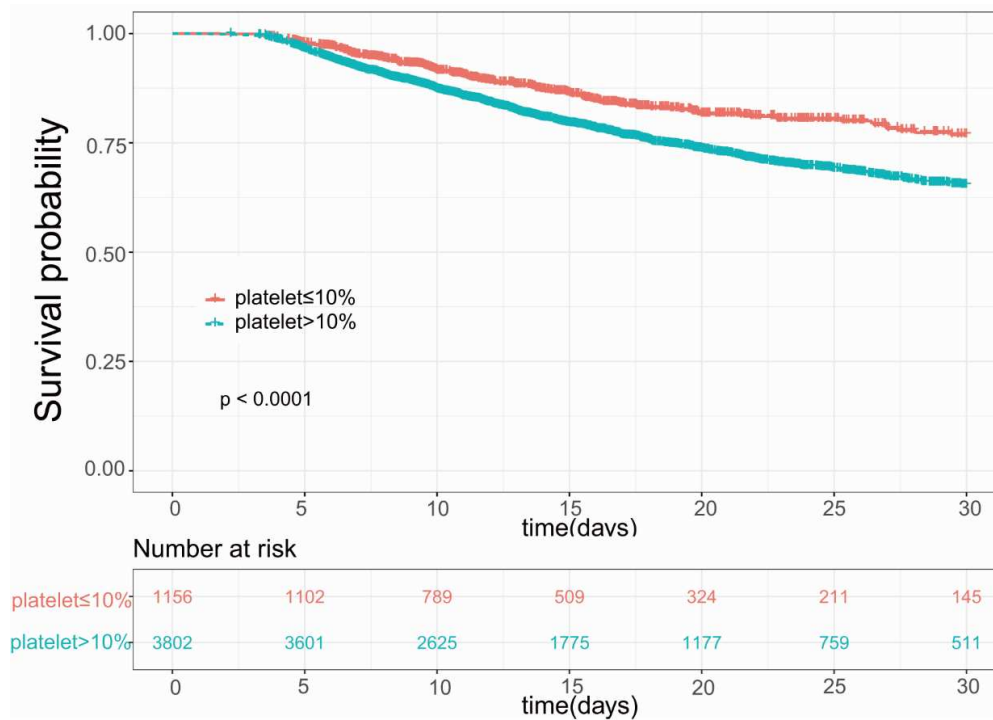

Figure S1. Kaplan-Meier survival curves were used to analyse the association between the percentage change in platelet count on day four compared to day one and the mortality within 30 days, excluding patients with no decline or even an increase in platelet counts on day four at the time of inclusion into the study

Table S5. Univariate and multivariate analyses were performed to assess mortality within 30 days, excluding patients with platelet counts < 100 K/ul on day one at the time of inclusion

| Variables                 | Univariate analysis |           |          | Multivariate analysis |           |          |
|---------------------------|---------------------|-----------|----------|-----------------------|-----------|----------|
|                           | OR                  | CI 95%    | <i>p</i> | OR                    | CI 95%    | <i>p</i> |
| Age                       | 1.03                | 1.02-1.03 | <0.001   | 1.03                  | 1.03-1.04 | <0.001   |
| Cardiovascular disease    | 1.49                | 1.31-1.69 | <0.001   | 1.10                  | 0.95-1.28 | 0.210    |
| Liver disease             | 1.63                | 1.37-1.92 | <0.001   | 1.40                  | 1.15-1.70 | 0.001    |
| Renal disease             | 1.50                | 1.30-1.74 | <0.001   | 0.94                  | 0.80-1.11 | 0.484    |
| Vascular disease          | 1.40                | 1.22-1.59 | <0.001   | 1.59                  | 1.37-1.83 | <0.001   |
| Cancer                    | 1.70                | 1.44-2.00 | <0.001   | 1.90                  | 1.57-2.29 | <0.001   |
| Sapsii                    | 1.04                | 1.03-1.04 | <0.001   | 0.99                  | 0.98-1.00 | 0.001    |
| Sofa                      | 1.14                | 1.12-1.16 | <0.001   | 0.99                  | 0.97-1.02 | 0.576    |
| Apsiii                    | 1.03                | 1.03-1.03 | <0.001   | 1.03                  | 1.03-1.04 | <0.001   |
| WBC (k/ul)                | 1.02                | 1.01-1.03 | <0.001   | 1.01                  | 1.00-1.01 | 0.143    |
| Pt (s)                    | 1.02                | 1.02-1.03 | <0.001   | 1.01                  | 1.00-1.02 | 0.016    |
| Aptt (s)                  | 1.01                | 1.01-1.01 | <0.001   | 1.00                  | 1.00-1.01 | 0.125    |
| <sup>a</sup> platelet≤10% | 0.54                | 0.47-0.61 | <0.001   | 0.72                  | 0.63-0.83 | <0.001   |

CI, confidence interval; OR, odds ratio; Sapsii, simplified acute physiology score; Sofa, sequential organ failure assessment; Apsiii, acute physiology score; WBC, white blood cell counts; Pt, prothrombin time; Aptt, activated partial thromboplastin time.

<sup>a</sup>platelet≤10% is regarded as declining proportion of platelet counts on day 4 of ICU admission.

Figure S2. Kaplan-Meier survival curves

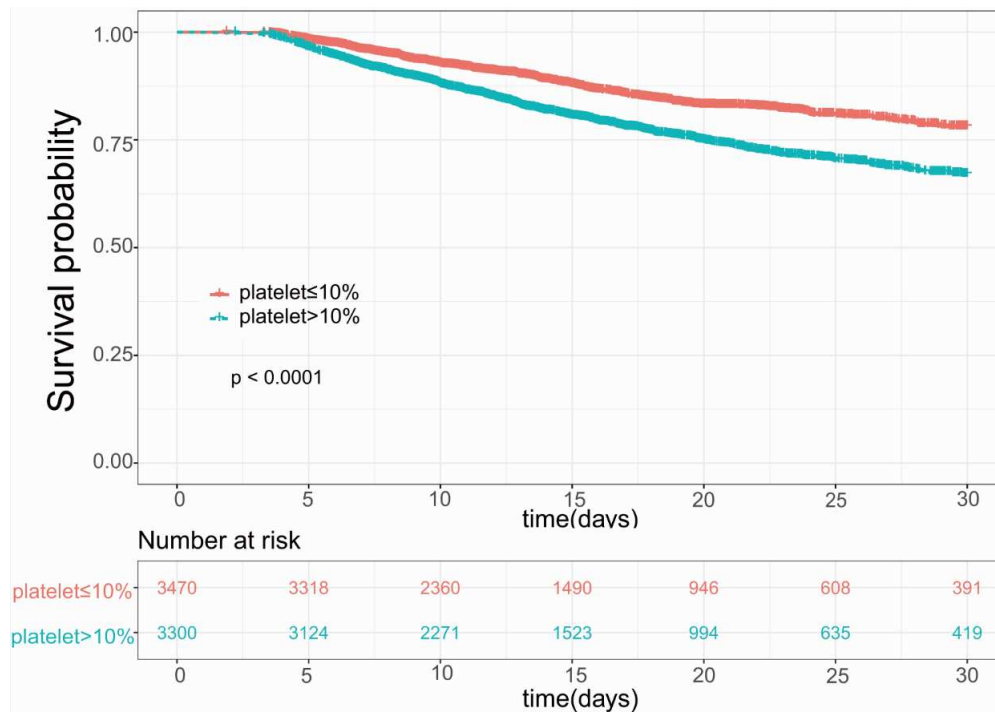

Figure S2. Kaplan-Meier survival curves were used to analyse the association between the percentage change in platelet count on day four compared to day one and the mortality within 30 days, excluding patients with platelet counts < 100 K/ul on day one at the time of inclusion into the study.
